# Supplementary material for: Self-testing for the detection of SARS-CoV-2 infection with rapid antigen tests
Source: bioRxiv or medRxiv preprint supplement (doi:10.1101/2021.02.21.21252153), 2021-02-23

# Lab Developed Assay

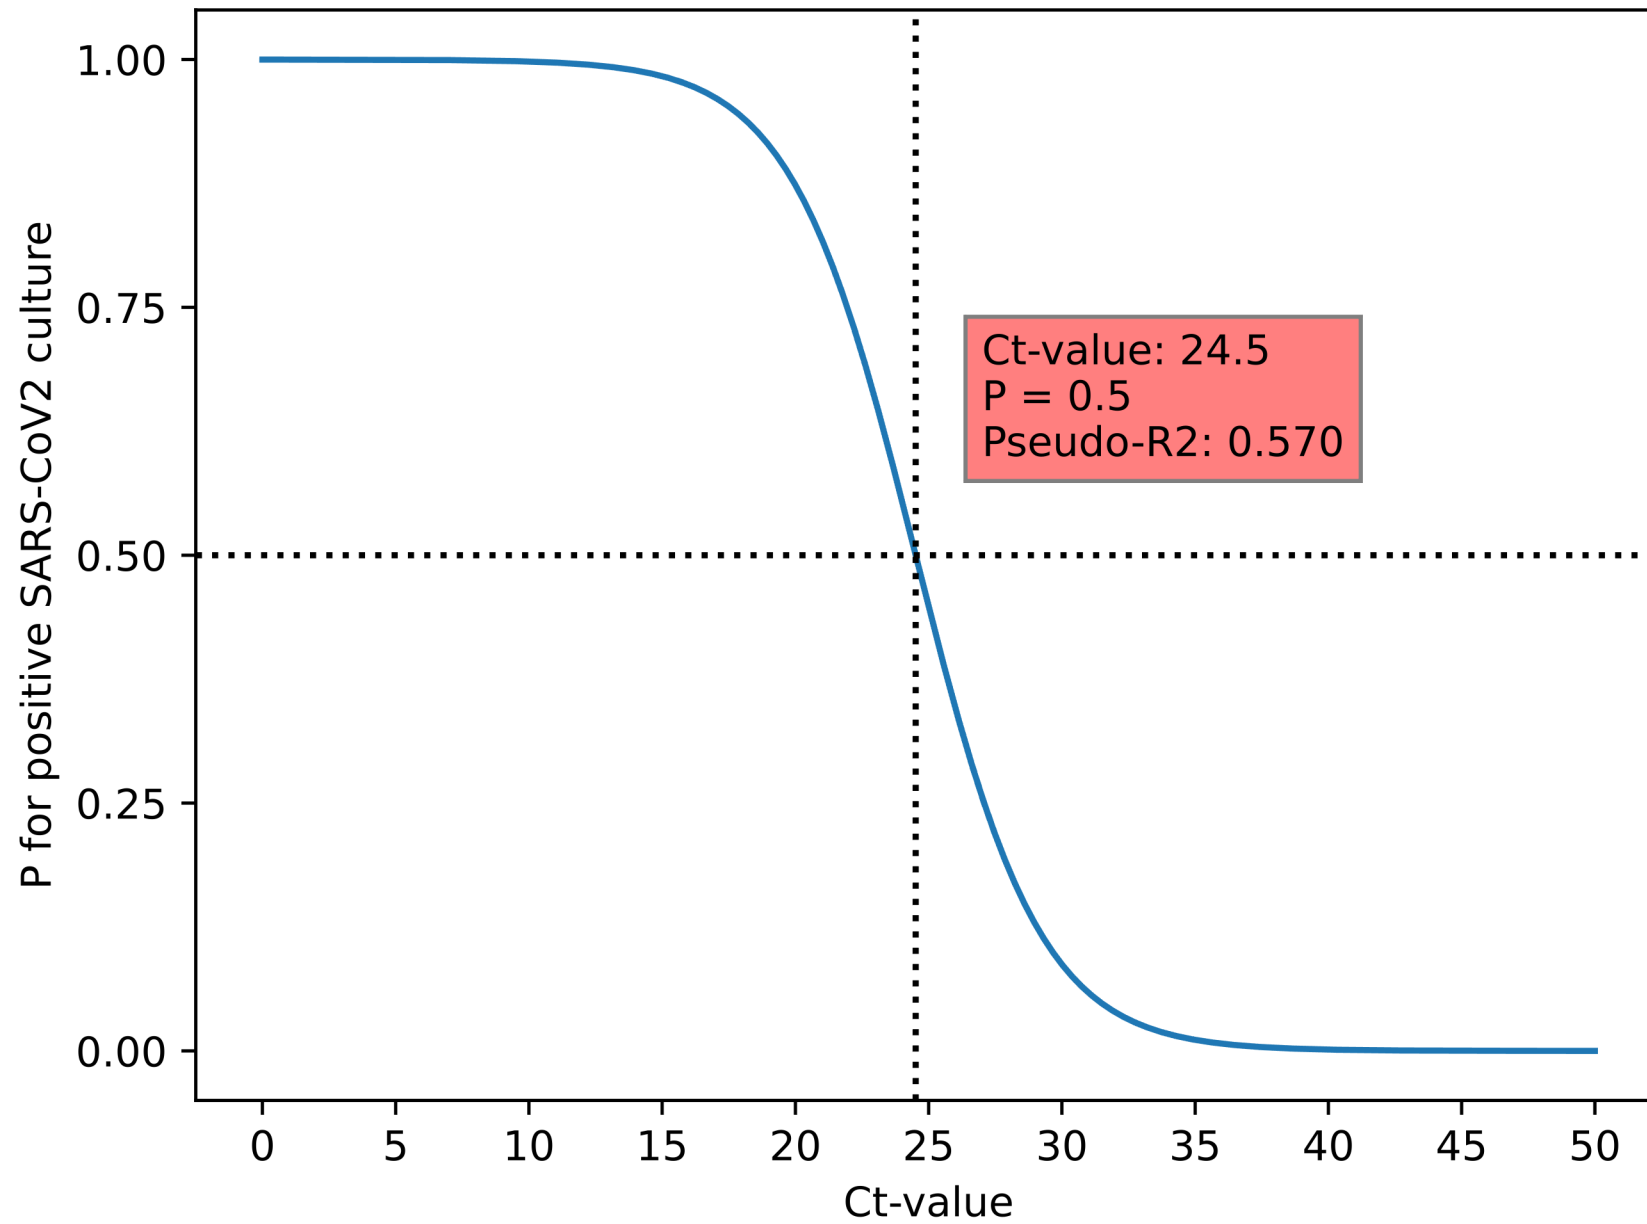

Supplement: Supplementary file [file media-5.pdf]
